# Supplementary material
Source: PubMed Central journal article supplement (PMC2895113)
Supplement: 1000284107_pnas.1000284107_SI.pdf [file 1000284107_pnas.1000284107_SI.pdf]

# Supporting Information

Delalez et al. 10.1073/pnas.1000284107

## SI Text

**Construction and Characterization of YPet Fusion Strains.** A construct containing the last 500 bp of *fliM*, followed by *yPet* and then 500 bp downstream of *fliM* containing the last 9 codons of FliM, was generated by overlap extension PCR (1) and cloned into pDS132 (2). This was sequenced and inserted into the *E. coli* RP437 chromosome by allelic exchange (3). Expression levels of FliM-YPet in both JPA945 and JPA954 strains were compared to FliM expression level in wild-type *E. coli* RP437 by Western blot analysis and found to agree within experimental error. Swarm plate assays showed only a small reduction in chemotaxis and motility (~75% of the wild-type swarm diameter). CheY<sup>D13K/Y106W</sup> and CheY<sup>D57A</sup> were overexpressed from pIND4 (4) in the  $\Delta cheY$  strain.

**Estimating the Total Content of FliM-YPet per Cell.** The average fluorescence intensity observed per pixel  $I_m(x_0, y_0, z_0)$  due to the diffusive cytoplasmic component of FliM-YPet (following subtraction of autofluorescence and instrumental background) at an arbitrary point  $(x_0, y_0, z_0)$  was modeled as a 3D convolution integral of the point spread function  $P(x, y, z)$  of a single YPet molecule with the spatial distribution function for number density of YPet in the cell  $dN/dV(x, y, z)$ , multiplied by the normalized local fluorescence excitation intensity function  $L(x, y, z)$  over the 3D cellular volume:

$$\begin{aligned} I_m(x_0, y_0, z_0)dA &= I_{YPet} \frac{dN}{dV} \otimes P \otimes L \\ &= I_{YPet} \iint_{\text{cell}} \int \frac{dN}{dV} P(x - x_0, y - y_0, z - z_0) \\ L(x, y, z) dx dy dz &= n I_{YPet} \iint_{\text{cell}} \int P(x - x_0, y - y_0, z - z_0) \\ &\quad \times \exp(-z/d) dx dy dz \equiv n I_{YPet} S. \end{aligned}$$

$P$  was estimated from an earlier investigation (5), which generated  $z$ -stack images for 20 nm diameter yellow fluorescent beads (Molecular Probes) immobilized to the coverslip surface. The integral limits were defined by the spatial boundaries of the cell body in  $x$ ,  $y$ , and  $z$ , approximating the cell as a cylinder of length 2  $\mu\text{m}$  and diameter 1  $\mu\text{m}$  with hemispherical caps. The number density of YPet molecules,  $n$ , was approximated as constant throughout the cell.  $I_{YPet}$  is the unitary step size equivalent to the total summed intensity due to a single YPet molecule excited at the origin (i.e., when  $L = 1$ ), taken as ~1,300 counts on our camera detector (Fig. S2). The function  $L$  reflects the spatial distribution of the normalized fluorescence excitation field [here the total internal reflection fluorescence (TIRF) evanescent field]. Here  $d$  is the depth of penetration of the evanescent field that we measure using the method of ref. 5 as being  $110 \pm 10$  nm. We assumed that the primary functional dependence in  $L$  is on  $z$  and not  $x$  or  $y$  (the length of a typical cell is small compared to the lateral width of the TIRF excitation field). In addition, the cell was assumed to be offset ~50 nm from the coverslip surface due to the presence of the flagellar stub following truncation, as indicated previously (6). The pixel area  $dA$  at the sample plane is 50 nm  $\times$  50 nm. The integral  $S$  was estimated numerically using values of  $x_0$  and  $y_0$  over a range  $\pm 2$   $\mu\text{m}$  centered on the model cell.

For the FliM-YPet strain we measured experimentally  $I_m = 1,450 \pm 200$  counts per pixel. Optimizing the value of  $S$  to fit this mean level of fluorescence intensity indicated  $S = 29.6 \pm 5.2$  (Fig. S1). This implied a value of  $n = 0.038 \pm 0.010$  YPet

molecules per 50  $\times$  50  $\times$  50 nm voxel. We estimate that the average volume of a FliM-YPet (wild-type) strain cell was  $16,800 \pm 6,300$  voxels. This indicates the total mean number of FliM-YPet in the cytoplasm is  $630 \pm 290$  molecules per cell.

Cells photobleached for 10 s or more using epifluorescence illumination, in the presence of chloramphenicol to block protein synthesis, showed less than 1% fluorescence recovery after 20 min, indicating maturation of YPet chromophores was negligible on the time scale of our experiments.

**Simulating Turnover.** Following previous studies (7–12), we modeled FliM turnover using a kinetic model describing reactions between diffusive FliM-YPet in the cytoplasm and the C ring in a membrane-integrated flagellar motor:

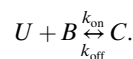

$U$  is the unbound population of photoactive FliM-YPet in the cell cytoplasm,  $B$  the FliM binding sites on a C ring, and  $C$  the bound population of photoactive FliM-YPet. The system contains particles described by reaction-diffusion kinetics (7–10).

$$\frac{\partial u}{\partial t} = D \nabla_r^2 u - k_{\text{on}}^* u + k_{\text{off}} c, \quad \frac{\partial c}{\partial t} = k_{\text{on}}^* u - k_{\text{off}} c.$$

Here  $\mathbf{r}$  is the position vector. This assumes a population of FliM bound to a flagellar motor C ring,  $c$ , which is immobile, whereas free FliM-YPet,  $u$ , diffuses throughout the cell cytoplasm. We assume that the concentration of free binding sites  $B$  remains at a pseudoequilibrium value  $B_{\text{eq}}$  throughout, implying a pseudo-first-order reaction constant,  $k_{\text{on}}^* = k_{\text{on}} B_{\text{eq}}$ . The boundary conditions are Neumann zero flux, enforcing conservation of total mass. Immediately postbleach ( $t = 0$ ) the variables  $u(t = 0, \mathbf{r})$  and  $c(t = 0, \mathbf{r})$  are defined according to the experimental bleaching profile.

With simplifications, analytical solutions to the governing partial differential equations (PDEs) are obtainable (7, 11, 12). However, more complex diffusion-coupled systems with nontrivial domain geometry or lack of symmetry result in higher spatial dimensionality of the variables  $u$  and  $c$  and require numerical schemes to simulate the reaction-diffusion process, as was the case here. Simulation was employed similar to the methodology as reported previously for a reaction-diffusion system confined to the two-dimensional bacterial cell membrane (6) but here incorporating full 3D diffusion in the cell cytoplasm. The input parameters included in the algorithm were

$D$  = diffusion coefficient,

$k_{\text{on}}, k_{\text{off}}$  = kinetic rate parameters,

$B_{\text{tot}}$  = total number of binding sites per motor complex,

$B_{\text{nd}}$  = number of nondynamic FliM attached to amotor complex,

$r_c$  = capture radius of motor complex,

$\sigma$  = spatial bleach width,

$t_p$  = bleach pulse duration,

$A$  = bleach magnitude,

$\Omega$  = analytic definition of the domain geometry,

$\Delta t$  = simulation time step,

$T$  = total simulation time.

The simulations were discrete and probabilistic, using a simple form of Brownian dynamics (13) at the molecular level. We assumed a realistic geometry of an *E. coli* cell, namely, a cylinder capped at both ends with two hemispheres with a total length along the long axis of 3  $\mu\text{m}$  and common radius 0.5  $\mu\text{m}$  (6). By using a diffusion-to-capture approach (14), C rings were modeled as fixed capture zones mounted at positions on the cell membrane chosen to correspond closely with the experimentally observed positions of fluorescent foci, with a diameter of 50 nm as suggested by cryoelectron microscopy of the flagellar motor (15–17). Single FliM-YPet molecules were modeled as noninteracting point particles undergoing a Brownian random walk within the cytoplasm. The system was initialized with a simulated FRAP bleach pulse of duration  $t_p = 300$  ms, focused typically close to the cell pole as was the case experimentally.

The bleach pulse had a characteristic Gaussian width  $\sigma$  and amplitude  $A$ , calculated from experimental bleaching data (see *Estimating diffusion coefficient*). We assumed a total of  $\sim 630$  molecules of FliM-YPet per cell. For the motor bound component we ran simulations over a range of 14–30 dynamic molecules per motor. Best fits were obtained using  $\sim 20$  dynamic FliM-YPet per motor with the remaining  $\sim 10$  were static throughout in order to match observed asymptotic FRAP and FLIP levels (see *Estimating the nondynamic fraction of FliM at the motor*).

Experimentally we estimate there were  $\sim 24$  FliM-YPet complexes integrated into the membrane per cell. This corresponds to a mean separation of  $> 1$   $\mu\text{m}$ , which is very large compared to the diameter of the capture zone; thus the presence of additional complexes does not perturb the kinetics of the system in any significant way, and we ignored these effects.

The fluorescence state of each FliM-YPet molecule was modeled as a binary system (either fluorescent or dark due to irreversible photobleaching) and the status of each molecule following the initial bleach was stored in memory. The simulations modeled a continuous time reaction-diffusion system by sampling the system at sufficiently short discrete time steps as described by Andrews and Bray (18), here typically 0.1 ms.

The output of the simulation was designed to match the imaging data produced from a real FRAP experiment, namely, the intensity at the motor due to protein turnover. Since the method is stochastic, the simulated data produced from a single iteration are noisy and many iterations are required to acquire a sufficiently smooth (averaged) FRAP curve (Fig. S2). In general for each set of parameters  $\sim 20$  iterations minimized the simulation noise to a level smaller than the observed experimental error of the mean FRAP traces.

Due to the computational demands of the algorithm it was not possible to search through the entire parameter space for a complete parameter optimization. However, it has been suggested by Zadeh et al. that the problem of parameter optimization over the two kinetic parameters and the diffusion coefficient is not well-posed and there is no unique best-fitting set of these parameters (19). We therefore minimized the parameter search to include only the rate constants, constraining the other parameters to values determined by other means (see other sections herein for estimation methods).

A plot of the experimental FRAP data with overlaid simulation output for comparison is shown (Fig. S3). Following simulation with several different values for rate constants, we observed that most of the experimental data was found between simulations curves for  $k_{\text{off}}$  in the range 0.01–0.02  $\text{s}^{-1}$  and  $k_{\text{on}}$  set to an arbitrarily high value (in our case in excess of  $10^{10}$   $\text{s}^{-1}$ ) imposing that

the protein molecules react instantly upon collision with their complementary binding site (6). We then used linear interpolation between two bounding simulation traces of different  $k_{\text{off}}$  value for all mean experimental FRAP time points, which indicated a mean effective dwell time  $\tau \sim 1/k_{\text{off}}$  for a single dynamic FliM-YPet protein molecule on the C ring of  $\sim 40$  s (SD error  $\sim 70\%$ ).

**Estimating Diffusion Coefficient.** In a typical FRAP experiment it is often assumed that the bleach pulse is rapid compared with the time scale for diffusion in the sample. This is valid in the case of slowly diffusing fluorophores bleached with a short duration laser pulse. An example of this is diffusion of fluorescent fusion proteins in a cell membrane where typically the diffusion constant is of the order of  $\sim 0.01$   $\mu\text{m}^2 \text{s}^{-1}$  (5, 20). In the case of cytoplasmic diffusion, however, particles diffuse several orders of magnitude faster (21, 22), typically  $\sim 10$   $\mu\text{m}^2 \text{s}^{-1}$ . Here the assumption of an instantaneous bleach pulse is not justified, since even a short pulse is on the order of 10–100 ms. From simple Brownian diffusion theory the characteristic distance for a particle diffusing at  $D \sim 10$   $\mu\text{m}^2 \text{s}^{-1}$  during a 100-ms pulse  $t$  is  $\sim (6Dt)^{1/2}$  or  $\sim 2.5$   $\mu\text{m}$ , comparable to the length of an *E. coli* bacterium and substantially greater than typical bleach spot radii used in such experiments, which is often  $\sim 0.5$   $\mu\text{m}$ . Hence many more fluorophores will travel through the bleach spot during a finite length bleach pulse than during a theoretical infinitely short pulse.

Due to the rapid nature of diffusion of FliM-YPet cytoplasmic component, it is technically nontrivial to image the recovery of fluorescence within the cytoplasm directly, as this is essentially complete before the first postbleach time point is taken following FRAP. However, measurement of the pre- and postbleach intensity at motor complexes and asymptotic fluorescence recovery (FRAP) and loss (FLIP) values allows inference of the proportion of the bound and cytoplasmic fluorophore population that is bleached during the initial laser pulse. The limiting normalized intensity values required are  $I_{\text{frap, (pre)}}$ ,  $I_{\text{frap, (t=0)}}$ ,  $I_{\text{flip, (pre)}}$ , and  $I_{\text{flip, (t=0)}}$ ; based on these values one can calculate the proportion of bound protein units that exhibit dynamic turnover on the time scale of the experiment. In a similar manner it is possible to ascertain the fraction of free cytoplasmic components that remain photoactive postbleach,  $f$ .

We assume photobleaching is a probabilistic Poisson process with decay rate of decay determined by the laser power. In the case of FRAP experiments, the laser power is modeled as a Gaussian in the  $xy$  focal plane. For a static fluorophore such as those bound to the motor complex, the time dependence of the concentration is

$$\frac{du}{dt} = -ku,$$

where  $u = u(t,x,y,z)$  is the concentration of active fluorophore and  $k$  is a rate constant describing the photobleaching process, giving a simple exponential solution for a continuum model. We assume that the value of the rate constant is directly proportional to the power of the laser at that spot. Our experimental protocol here allows us to calculate  $k$  at two distinct points in a bacterial cell, namely, the FRAP and FLIP centers, as fluorophores at these two locations are static over the duration of the bleach pulse  $t_p = 300$  ms. Considering the normalized intensity  $I = I_{\text{frap, (t=0)}}$  and  $t = 300$  ms we deduce

$$k = \frac{-\ln(1 - I_{t=0})}{t_p}. \quad [\text{S1}]$$

This is proportional to the laser intensity function  $G$ . This takes the form

$$k \propto G(x,y) = A \exp\left(\frac{(x-x_b)^2 + (y-y_b)^2}{2\sigma^2}\right). \quad [\text{S2}]$$

$A$  is a constant expressing bleach magnitude,  $(x_b, y_b)$  are the coordinates of the bleach pulse focus, and  $\sigma$  is the width of the pulse. The bleach focus is typically near to the cell pole and is denoted the origin of the coordinate system for simplicity; hence  $x_b = y_b = 0$ . Knowledge of the ratio of two spatially distinct values of the bleaching constant  $k$  allows inference of the bleach width by equating Eqs. 1 and 2:

$$\frac{k_{\text{frap}}}{k_{\text{flip}}} = \frac{G(x_{\text{frap}}, y_{\text{frap}})}{G(x_{\text{flip}}, y_{\text{flip}})} = \frac{\ln(1 - I_{\text{frap},(t=0)})}{\ln(1 - I_{\text{flip},(t=0)})} = \exp\left(\frac{-r_{\text{frap}}^2 + r_{\text{flip}}^2}{2\sigma^2}\right),$$

where  $r_{\text{frap}}$  indicates the position vector of the FRAP region in the  $xy$  plane relative to the origin (the bleach focus). We solve for  $\sigma$  and  $A$  by a simple rearrangement and substitution. The experimental data and calculated constants are summarized below:

$$\begin{aligned} t_p &= 0.3 \text{ s}, & I_{\text{frap},(t=0)} &= 0.11, & I_{\text{flip},(t=0)} &= 0.97, \\ r_{\text{frap}} &= (0,0,0.8) \text{ } \mu\text{m}, & r_{\text{flip}} &= (0,0,2.8) \text{ } \mu\text{m}, & f &= 0.55, \\ \sigma &= 0.92 \text{ } \mu\text{m}, & A &= 10.77 \text{ s}^{-1}. \end{aligned}$$

For simulations of diffusion during a photobleaching pulse a continuum model exists in the form of a PDE in terms of  $u = u(t,x,y,z)$  (for a 3D domain such as the cell geometry under consideration here):

$$\frac{\partial u}{\partial t} = -D\nabla_r^2 u - A \exp\left(\frac{-(x^2 + y^2)}{2\sigma^2}\right)u. \quad [\text{S3}]$$

The first term corresponds to Brownian motion and the second is the Gaussian bleaching term, which is only dependent on the position in the  $xy$  plane. Zero flux Neumann boundary conditions ensure that the fluorescence is contained within the domain. The model domain is designed to mimic the shape of an *E. coli* cell and comprises a cylinder capped at either end with hemispheres (see *Simulating Turnover*). A simple analytic solution of the governing PDE is not, to the best of our knowledge, obtainable on a complex domain; thus, we explored numerical solutions. We used a Monte Carlo algorithm, in a similar fashion to that used to simulate the FRAP itself. The procedure includes diffusion of discrete fluorescent molecules with probabilistic bleaching according to the laser intensity at their positions in the cell. To validate the model, the expected photobleaching was also calculated for a static diffusion scenario by numerical integration of the Gaussian bleaching function over the cell domain using the Matlab function *triplequad*. Fig. S4 shows the effect of varying the diffusion coefficient in these simulations. These simulations indicate a value of  $D = 7 \pm 5 \text{ } \mu\text{m}^2 \text{ s}^{-1}$  to best fit the observed experimental cytoplasmic bleached fraction  $f \approx 0.55$ . These results illustrate that with a very short laser pulse there is relatively little difference to the final bleached fraction—this is intuitively reasonable since large differences in bleached fraction will only be noticeable if the duration of the pulse is large enough to allow a significant fraction of cytoplasmic FliM-YPet to diffuse through the laser focal waist. So, it is not surprising that the curves are very similar for short duration pulses. For larger duration pulses the simulation curves do show clear deviation from each other. However, what they also indicate is that this relative deviation gets less for increasing increments of diffusion coefficient—this is also intuitively reasonable since a value of diffusion coefficient that increases the root mean squared displacement from the laser pulse much beyond the width of

the laser pulse does not therefore result in any additional bleaching effect.

**Estimating the Nondynamic Fraction of FliM at the Motor.** Fig. S5 illustrates idealized FRAP and FLIP traces both normalized for intensity relative to prebleach intensity levels, for which a focused-laser bleach is applied at time zero (assuming a typically comparatively small correction for photobleaching at subsequent postbleach observation time points). Generally, a fluorescent spot complex of FliM-YPet within the original laser spot bleach zone will have a small but nonzero fluorescence intensity following the bleach (level  $\beta$ ), and similarly a fluorescent spot complex outside the laser focus will have a normalized intensity slightly less than 1 (level  $\gamma$ ) since the laser focus does not have sharp boundaries but is a continuum. Here we denote:

$S$  = total stoichiometry of the FliM-YPet complex,

$I_1$  = unitary intensity of a single photoactive YPet molecule,

$\alpha$  = dynamic fraction of the FliM-YPet complex,

$1 - \alpha$  = nondynamic fraction of the FliM-YPet complex,

$f$  = average fraction of FliM-YPet photobleached in

× a single cell following a focused laser bleach,

$I_{\text{FLIP}}(t)$  = intensity of FLIP trace at time  $t$   
× following focused laser bleach ( $t > 0$ ),

$I_{\text{FRAP}}(t)$  = intensity of FRAP trace at time  $t$   
× following focused laser bleach ( $t > 0$ ).

At large time postbleach of  $\sim 1,000$  s (pseudoequilibrium) we assume that the proportion of bleached to unbleached FliM-YPet in the dynamic portion of the FliM-YPet complex is the same as that in the rest of the cell. Hence, the total intensity of dynamic portion of complex at equilibrium =  $(1-f)\alpha SI_1$  and total intensity of the nondynamic portion of complex following focused-laser bleach for FRAP trace =  $(1-\alpha)\beta SI_1$ . Similarly, total intensity of the nondynamic portion of complex following focused-laser bleach for FLIP trace =  $(1-\alpha)\gamma SI_1$ .

Thus:

$$\begin{aligned} I_{\text{FRAP}}(\infty) &= (1-f)\alpha SI_1 + (1-\alpha)\beta SI_1 \\ &= SI_1((1-f)\alpha + (1-\alpha)\beta), \end{aligned}$$

$$\begin{aligned} I_{\text{FLIP}}(\infty) &= (1-f)\alpha SI_1 + (1-\alpha)\gamma SI_1 \\ &= SI_1((1-f)\alpha + (1-\alpha)\gamma). \end{aligned}$$

Rearranging,

$$\alpha = 1 - (I_{\text{FLIP}}(\infty) - I_{\text{FRAP}}(\infty))/SI_1(\gamma - \beta).$$

Thus, the situation for which the FRAP and FLIP normalized intensity traces converge asymptotically at high time is indicative of turnover in a complex for which all the corresponding subunits are dynamic, as expected if the state has reached pseudoequilibrium. The parameters  $\beta$ ,  $\gamma$ ,  $I_{\text{FRAP}}(\infty)$ , and  $I_{\text{FLIP}}(\infty)$  were estimated using single exponential fits to the normalized photobleach-corrected intensity data for the mean curves for FRAP and FLIP datasets for the FliM-YPet (wild-type), the  $\Delta\text{CheY}/\text{FliM-YPet}/\text{CheY}^{\text{D13K}/\text{Y106W}}$ , and the  $\Delta\text{CheY}/\text{FliM-YPet}/\text{CheY}^{\text{D57A}}$  strains, outlined in Table S1. This indicates no statistical differences between the combined FRAP and FLIP mean

data for the two strains, and a mean value of  $\alpha = 0.64 \pm 0.21$ . Assuming a mean stoichiometry of  $\sim 30$  molecules per FliM-YPet complex, this indicates the dynamic fraction consists of  $\sim 20$  FliM-YPet molecules and the nondynamic fraction  $\sim 10$  FliM-YPet molecules. For the FliM-YPet ( $\Delta$ CheY) strain a small increase ( $<5\%$ ) in the normalized FRAP intensity data could be observed after  $\sim 1,000$  s postbleach, which was fitted by a single exponential function; however, the corresponding single exponential fit for the normalized FLIP trace was comparatively poor, but indicating a very small decrease in intensity of  $\sim 2\%$ . This indicated that the corresponding  $\alpha = 0.04 \pm 0.29$ , consistent

with no significant dynamic fraction within experimental error at least over the time scale of  $\sim 1,000$  s of these experiments.

**Performing FRAP and FLIP on Putative Assembly Intermediate Complexes.** To assess the turnover of putative assembly intermediate complexes, we performed similar FRAP/FLIP analysis on fluorescent spots from immobilized cells with a stoichiometry within 1 SD of the mean of the peak at 18 molecules. These indicated no significant turnover within experimental error over the time scale of our observations of  $\sim 1,000$  s and were of a comparable final intensity level to the  $\Delta$ CheY strain (Fig. S6).

- Wadhams GH, Warren AV, Martin AC, Armitage JP (2003) Targeting of two signal transduction pathways to different regions of the bacterial cell. *Mol Microbiol* 50:763–770.
- Philippe N, Alcaraz JP, Coursange E, Geiselmann J, Schneider D (2004) Improvement of pCVD442, a suicide plasmid for gene allele exchange in bacteria. *Plasmid* 51:246–255.
- Link AJ, Phillips D, Church GM (1997) Methods for generating precise deletions and insertions in the genome of wild-type *Escherichia coli*: Application to open reading frame characterization. *J Bacteriol* 179:6228–6237.
- Ind AC, et al. (2009) An inducible expression plasmid for *Rhodobacter sphaeroides* and *Paracoccus denitrificans*. *Appl Environ Microbiol* 75:6613–6615.
- Lo CJ, Leake MC, Pilizota T, Berry RM (2007) Single-cell measurements of membrane potential, sodium-motive force and flagellar motor speed in *Escherichia coli*. *Biophys J* 93:294–302.
- Leake MC, et al. (2006) Stoichiometry and turnover in single, functioning membrane protein complexes. *Nature* 443:355–358.
- Sprague BL, Pego RL, Stavreva DA, McNally JG (2004) Analysis of binding reactions by fluorescence recovery after photobleaching. *Biophys J* 86:3473–3495.
- Sprague BL, et al. (2006) Analysis of binding at a single spatially localized cluster of binding sites by fluorescence recovery after photobleaching. *Biophys J* 91:1169–1191.
- Tsibidis GD, Ripoll J (2008) Investigation of binding mechanisms of nuclear proteins using confocal scanning laser microscopy and FRAP. *J Theor Biol* 253:755–768.
- Braga J, McNally JG, Carmo-Fonseca MA (2007) Reaction-diffusion model to study RNA motion by quantitative fluorescence recovery after photobleaching. *Biophys J* 92:2694–2703.
- Sprague B, McNally J (2005) FRAP analysis of binding: Proper and fitting. *Trends Cell Biol* 15:84–91.
- Tsibidis GD (2009) Quantitative interpretation of binding reactions of rapidly diffusing species using fluorescence recovery after photobleaching. *J Microsc* 233:384–390.
- Cichocki B, Hinsen K (1990) Dynamic computer simulation of concentrated hard-sphere suspensions. 1. Simulation technique and mean square displacement data. *Physica A* 166:473–491.
- Berg HC (1993) *Random Walks in Biology* (Princeton Univ, Princeton, NJ), 4th Ed..
- Suzuki H, Yonekura K, Namba K (2004) Structure of the rotor of the bacterial flagellar motor revealed by electron cryomicroscopy and single-particle image analysis. *J Mol Biol* 337:105–113.
- Thomas DR, Morgan DG, DeRosier DJ (1999) Rotational symmetry of the C-ring and a mechanism for the flagellar rotary motor. *Proc Natl Acad Sci USA* 96:10134–10139.
- Thomas DR, Francis NR, Xu C, DeRosier DJ (2006) The three-dimensional structure of the flagellar rotor from a clockwise-locked mutant of *Salmonella enterica* serovar Typhimurium. *J Bacteriol* 188:7039–7048.
- Andrews SS, Bray D (2004) Stochastic simulation of chemical reactions with spatial resolution and single molecule detail. *Phys Biol* 1:137–151.
- Zadeh KS, Elman HC, Montas HJ, Shirmohammadi, A (2007) A finite element model for protein transport in vivo. *BioMed Eng OnLine* doi:10.1186/1475-925X-6-24.
- Leake MC et al. (2008) Variable stoichiometry of the TatA component of the twin-arginine protein transport system observed by in vivo single-molecule imaging. *Proc Natl Acad Sci USA* 105:15376–15381.
- Lenn T, Leake MC, Mullineaux CW (2008) Clustering and dynamics of cytochrome bd-I complexes in the *Escherichia coli* plasma membrane in vivo. *Mol Microbiol* 70:1397–1407.
- Segall JE, Ishihara A, Berg HC (1985) Chemotactic signaling in filamentous cells of *Escherichia coli*. *J Bacteriol* 161:51–59.

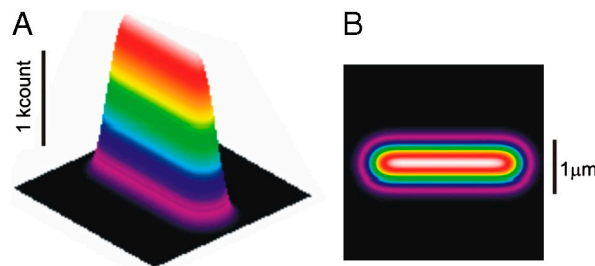

**Fig. S1.** Fluorescence intensity per pixel (false-color) due to diffusive component of FliM-YPet in the cytoplasm calculated using a 3D convolution model, displayed as (A) 3D contour plot and (B) projection onto the xy plane.



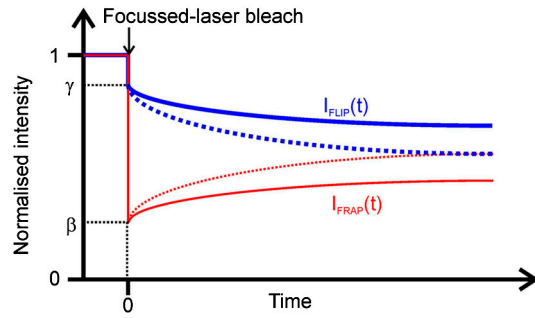

**Fig. S5.** Idealized FRAP (Red) and FLIP (Blue) traces normalized with respect to prebleach levels, with an assumed nondynamic population (Solid Lines) and with all components dynamics (Dotted Lines).

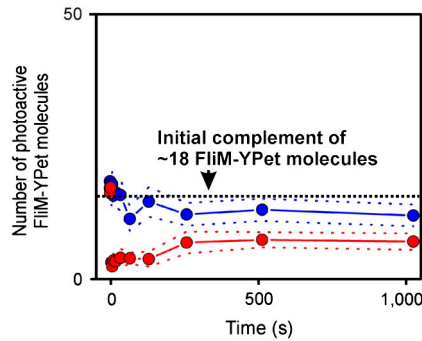

**Fig. S6.** Mean FRAP (Red) and FLIP (Blue) traces (SEM error bounds shown as dotted lines) for the FliM-YPet (wild-type) strain using immobilized cells and fluorescent spots whose estimated prebleach stoichiometry was within 1 SD of 18 molecules, 9 spots used for each mean trace.

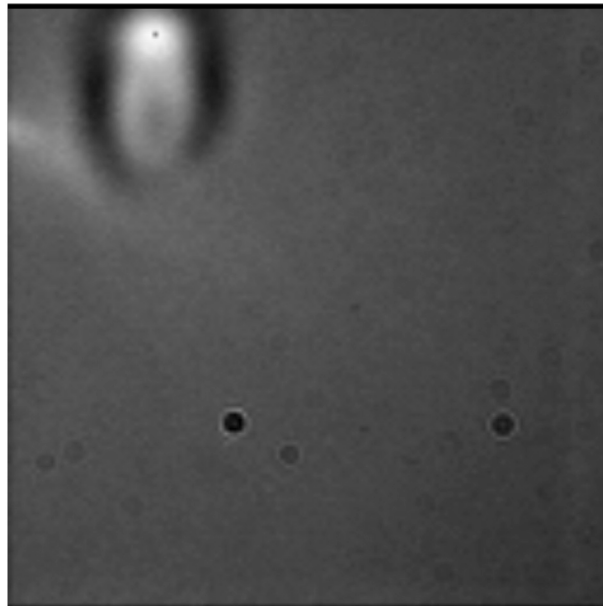

**Movie S1.** Bright-field movie of tethered FliM-YPet (wild-type) cell.  
[Movie S1 \(AVI\)](#)

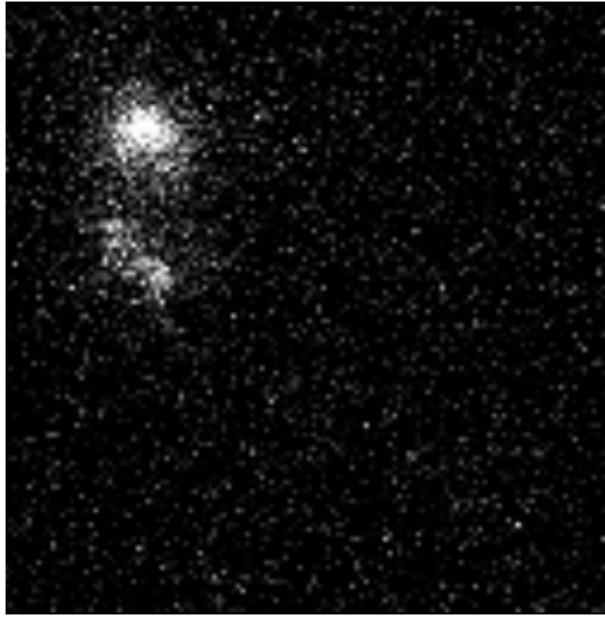

**Movie S2.** TIRF and focused-laser bleach movie of the same cell of Movie S1.  
[Movie S2 \(AVI\)](#)

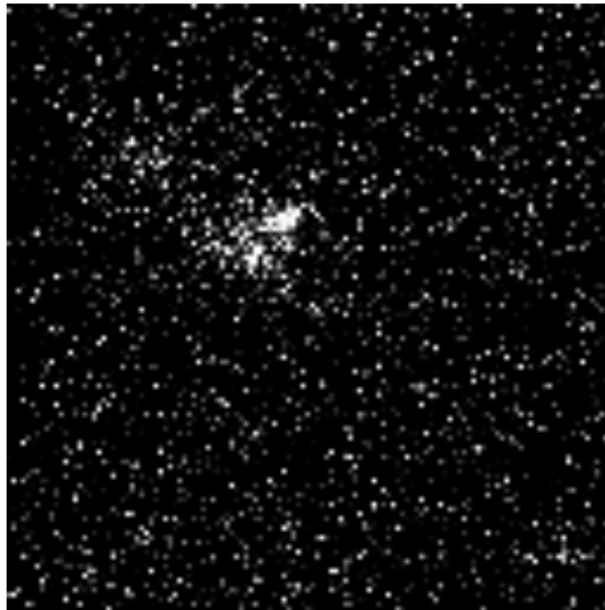

**Movie S3.** Movie of same cell of Movies S1 and S2 taken 10 min after focused-laser bleach. Recovery of fluorescence intensity can be seen at the original bleached motor position.  
[Movie S3 \(AVI\)](#)

**Table S1. Table for single exponential fit parameters [SD] to normalized turnover traces**

| Strain                                                 | Normalized $I_{FRAP}(\infty)$ | Normalized $I_{FLIP}(\infty)$ | $\beta$        | $\gamma$       | $t_b$ (s)    | $\alpha$       |
|--------------------------------------------------------|-------------------------------|-------------------------------|----------------|----------------|--------------|----------------|
| FliM-YPet (wild-type)                                  | 0.33<br>[0.09]                | 0.64<br>[0.14]                | 0.11<br>[0.09] | 0.97<br>[0.17] | 180<br>[28]  | 0.64<br>[0.20] |
| FliM-YPet ( $\Delta$ CheY)                             | 0.14<br>[0.04]                | 0.99<br>[0.20]                | 0.11<br>[0.03] | 1.00<br>[0.15] | 390<br>[205] | 0.04<br>[0.29] |
| FliM-YPet( $\Delta$ CheY, CheY <sup>D13K/Y106W</sup> ) | 0.21<br>[0.04]                | 0.78<br>[0.20]                | 0.14<br>[0.03] | 0.99<br>[0.24] | 186<br>[45]  | 0.67<br>[0.30] |
| FliM-YPet( $\Delta$ CheY, CheY <sup>D13K/Y106W</sup> ) | 0.31<br>[0.04]                | 0.70<br>[0.20]                | 0.04<br>[0.03] | 1.10<br>[0.20] | 202<br>[24]  | 0.65<br>[0.21] |

The value of  $t_b$  is the mean photobleach time from FRAP and FLIP datasets combined.
